# Supplementary material for: Evaluation of Lipid Accumulation Using Electrical Impedance Measurement under Three-Dimensional Culture Condition
Source: MDPI journal article supplement (doi:10.3390/mi10070455), 2019-07-06
Supplement: s1 [file s1]

# Supplementary Materials: Evaluation of Lipid Accumulation Using Electrical Impedance Measurement under Three-Dimensional Culture Condition

Daiki Zemmyo <sup>1</sup> and Shogo Miyata <sup>2,\*</sup>

<sup>1</sup> Graduate School of Science and Technology, Keio University, 3-14-1 Hiyoshi, Yokohama 223-8522, Japan

<sup>2</sup> Department of Mechanical Engineering, Faculty of Science and Technology, Keio University, 3-14-1 Hiyoshi, Yokohama 223-8522, Japan

\* Correspondence: miyata@mech.keio.ac.jp; Tel.: +81-45-566-1827

3T3-L1 cells were differentiated to adipocyte and stained by Oil-red O. The circle-like constituents were stained as lipid droplets.

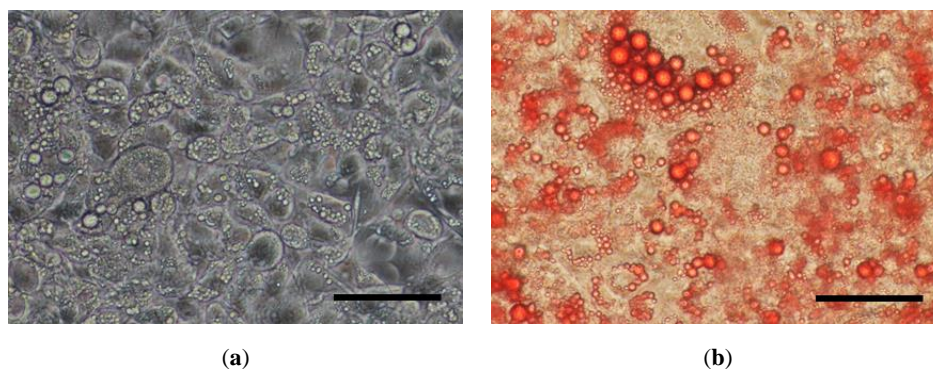

**Figure S1.** (a) Phase-contrast and (b) Oil red O stained images of differentiated 3T3-L1 cells. Scale bar: 100  $\mu\text{m}$ .
